# Supplementary material
Source: HighWire-hosted journal article supplement (https://bmjopen.bmj.com/content/12/8/e063040)
Supplement: inline-supplementary-material-1 [file inline-supplementary-material-1.pdf]

**APPENDIX A: Ovid MEDLINE(R) ALL August 2020 to April 19, 2021 search**

| #  | Searches                               | Results | Type     |
|----|----------------------------------------|---------|----------|
| 1  | Palliative Medicine/                   | 398     | Advanced |
| 2  | Palliative Care/                       | 55950   | Advanced |
| 3  | Hospice Care/                          | 6720    | Advanced |
| 4  | "Hospice and Palliative Care Nursing"/ | 1063    | Advanced |
| 5  | Terminal Care/                         | 29029   | Advanced |
| 6  | Terminally Ill/                        | 6622    | Advanced |
| 7  | exp Advance Care Planning/             | 9774    | Advanced |
| 8  | palliat*.mp,kw.                        | 102153  | Advanced |
| 9  | hospice*.mp,kw.                        | 18000   | Advanced |
| 10 | advanced.mp,kw.                        | 461504  | Advanced |
| 11 | (advance* adj3 directiv*).mp,kw.       | 8360    | Advanced |
| 12 | (advance* adj3 plan*).mp,kw.           | 8288    | Advanced |
| 13 | (terminal* adj3 patient?).mp,kw.       | 8691    | Advanced |
| 14 | (terminal* adj3 inpatient?).mp,kw.     | 57      | Advanced |
| 15 | (terminal* adj3 outpatient?).mp,kw.    | 10      | Advanced |
| 16 | (terminal* adj3 care?).mp,kw.          | 30626   | Advanced |
| 17 | (terminal* adj3 caring).mp,kw.         | 247     | Advanced |
| 18 | (terminal* adj3 ill*).mp,kw.           | 12800   | Advanced |
| 19 | (terminal* adj3 sick*).mp,kw.          | 44      | Advanced |

|                                     |                 |
|-------------------------------------|-----------------|
| 20 (terminal* adj3 disease?).mp,kw. | 2146 Advanced   |
| 21 (terminal* adj3 stage?).mp,kw.   | 3963 Advanced   |
| 22 (terminal* adj3 failure?).mp,kw. | 1860 Advanced   |
| 23 (terminal* adj phase?).mp,kw.    | 2220 Advanced   |
| 24 (terminal* adj mode?).mp,kw.     | 47 Advanced     |
| 25 (life adj3 threat*).mp,kw.       | 95952 Advanced  |
| 26 (life adj3 limiting).mp,kw.      | 2686 Advanced   |
| 27 (end adj3 life).mp,kw.           | 27349 Advanced  |
| 28 end-stage?.mp,kw.                | 75390 Advanced  |
| 29 palliat*.jw.                     | 23772 Advanced  |
| 30 or/1-29                          | 768503 Advanced |
| 31 exp Substance-Related Disorders/ | 285301 Advanced |
| 32 Drug Overdose/                   | 12053 Advanced  |
| 33 exp Opioid-Related Disorders/    | 28135 Advanced  |
| 34 Opium Dependence/                | 44 Advanced     |
| 35 exp Analgesics, Opioid/          | 119867 Advanced |
| 36 exp Opiate Alkaloids/            | 87726 Advanced  |
| 37 Opium/                           | 2016 Advanced   |
| 38 Cocaine-Related Disorders/       | 8445 Advanced   |
| 39 Cocaine Smoking/                 | 22 Advanced     |
| 40 exp Cocaine/                     | 25717 Advanced  |

|    |                                         |        |          |
|----|-----------------------------------------|--------|----------|
| 41 | exp Marijuana Abuse/                    | 6520   | Advanced |
| 42 | Marijuana Smoking/                      | 5027   | Advanced |
| 43 | Cannabis/                               | 9724   | Advanced |
| 44 | exp Cannabinoids/                       | 14882  | Advanced |
| 45 | exp Cannabaceae/                        | 10555  | Advanced |
| 46 | Smoking, Non-Tobacco Products/          | 16     | Advanced |
| 47 | Smoking/                                | 142362 | Advanced |
| 48 | "Tobacco Use Disorder"/                 | 11536  | Advanced |
| 49 | exp "Tobacco Use"/                      | 5973   | Advanced |
| 50 | exp Tobacco Smoking/                    | 4011   | Advanced |
| 51 | Electronic Nicotine Delivery Systems/   | 4345   | Advanced |
| 52 | Vaping/                                 | 1659   | Advanced |
| 53 | Cigar Smoking/                          | 44     | Advanced |
| 54 | Cigarette Smoking/                      | 2486   | Advanced |
| 55 | Nicotine/                               | 26112  | Advanced |
| 56 | Nicotine Chewing Gum/                   | 25     | Advanced |
| 57 | exp Alcohol-Related Disorders/          | 114739 | Advanced |
| 58 | exp Alcohol-Induced Disorders/          | 26382  | Advanced |
| 59 | Alcoholic Intoxication/                 | 12605  | Advanced |
| 60 | Alcohol Drinking/                       | 68875  | Advanced |
| 61 | exp Central Nervous System Depressants/ | 678242 | Advanced |

|    |                                                  |        |          |
|----|--------------------------------------------------|--------|----------|
| 62 | exp Benzodiazepines/                             | 66182  | Advanced |
| 63 | exp Central Nervous System Stimulants/           | 97523  | Advanced |
| 64 | exp Methamphetamine/                             | 9939   | Advanced |
| 65 | addict*.mp,kw.                                   | 73399  | Advanced |
| 66 | (substance? adj3 ("use" or using)).mp,kw.        | 46776  | Advanced |
| 67 | (substance? adj3 disorder?).mp,kw.               | 108296 | Advanced |
| 68 | (substance? adj3 dependen*).mp,kw.               | 4912   | Advanced |
| 69 | (substance? adj3 (abus? or abusing)).mp,kw.      | 56329  | Advanced |
| 70 | (substance? adj3 (misuse? or misused)).mp,kw.    | 3292   | Advanced |
| 71 | (substance? adj3 (overdos* or over-dos*)).mp,kw. | 140    | Advanced |
| 72 | (substance? adj3 habit*).mp,kw.                  | 157    | Advanced |
| 73 | (polysubstance? or poly-substance?).mp,kw.       | 1473   | Advanced |
| 74 | (drug? adj3 ("use" or using)).mp,kw.             | 120102 | Advanced |
| 75 | (drug? adj3 disorder?).mp,kw.                    | 6562   | Advanced |
| 76 | (drug? adj3 dependen*).mp,kw.                    | 13706  | Advanced |
| 77 | (drug? adj3 (abus? or abusing)).mp,kw.           | 29146  | Advanced |
| 78 | (drug? adj3 (misuse? or misused)).mp,kw.         | 4785   | Advanced |
| 79 | (drug? adj3 (overdos* or over-dos*)).mp,kw.      | 14318  | Advanced |
| 80 | (drug? adj3 habit*).mp,kw.                       | 899    | Advanced |
| 81 | opioid*.mp,kw.                                   | 127580 | Advanced |
| 82 | opiate*.mp,kw.                                   | 28655  | Advanced |

|     |                            |        |          |
|-----|----------------------------|--------|----------|
| 83  | opium*.mp,kw.              | 3841   | Advanced |
| 84  | 8008-60-4.rn.              | 2016   | Advanced |
| 85  | 8002-76-4.rn.              | 0      | Advanced |
| 86  | 53663-61-9.rn.             | 1      | Advanced |
| 87  | cocaine*.mp,kw.            | 44341  | Advanced |
| 88  | 50-36-2.rn.                | 0      | Advanced |
| 89  | 53-21-4.rn.                | 0      | Advanced |
| 90  | 5937-29-1.rn.              | 0      | Advanced |
| 91  | cannab*.mp,kw.             | 45169  | Advanced |
| 92  | cannador*.mp,kw.           | 3      | Advanced |
| 93  | drocannab*.mp,kw.          | 2      | Advanced |
| 94  | hemp*.mp,kw.               | 2056   | Advanced |
| 95  | mari?uana*.mp,kw.          | 22534  | Advanced |
| 96  | phytocannab*.mp,kw.        | 721    | Advanced |
| 97  | tetrahydrocannab*.mp,kw.   | 7947   | Advanced |
| 98  | 8001-45-4.rn.              | 2      | Advanced |
| 99  | 8063-14-7.rn.              | 0      | Advanced |
| 100 | (smoke? or smoking).mp,kw. | 325319 | Advanced |
| 101 | (vape? or vaping).mp,kw.   | 3018   | Advanced |
| 102 | tobacco*.mp,kw.            | 134178 | Advanced |
| 103 | cigar*.mp,kw.              | 76606  | Advanced |

|                                       |        |          |
|---------------------------------------|--------|----------|
| 104 nicotine*.mp,kw.                  | 49894  | Advanced |
| 105 nicorette*.mp,kw.                 | 99     | Advanced |
| 106 6m3c89zy6r.rn.                    | 26112  | Advanced |
| 107 r7m676m8yv.rn.                    | 0      | Advanced |
| 108 54-11-5.rn.                       | 0      | Advanced |
| 109 alcohol*.mp,kw.                   | 440090 | Advanced |
| 110 (central adj4 depressant?).mp,kw. | 10644  | Advanced |
| 111 (CNS adj3 depressant?).mp,kw.     | 720    | Advanced |
| 112 benzodiazepin*.mp,kw.             | 49172  | Advanced |
| 113 m0q7802g2b.rn.                    | 0      | Advanced |
| 114 12794-10-4.rn.                    | 22085  | Advanced |
| 115 (central adj4 stimulant?).mp,kw.  | 21213  | Advanced |
| 116 (CNS adj3 stimulant?).mp,kw.      | 455    | Advanced |
| 117 methamphetamin*.mp,kw.            | 14218  | Advanced |
| 118 methamfetamin*.mp,kw.             | 7      | Advanced |
| 119 deoxyephedrin*.mp,kw.             | 7      | Advanced |
| 120 desoxyn*.mp,kw.                   | 78     | Advanced |
| 121 methedrin*.mp,kw.                 | 41     | Advanced |
| 122 methyl amphetamin*.mp,kw.         | 38     | Advanced |
| 123 methylamphetamin*.mp,kw.          | 750    | Advanced |
| 124 norodin*.mp,kw.                   | 3      | Advanced |

|                                                   |                  |
|---------------------------------------------------|------------------|
| 125 pervitin*.mp,kw.                              | 104 Advanced     |
| 126 philopon*.mp,kw.                              | 7 Advanced       |
| 127 44ral3456c.rn.                                | 9634 Advanced    |
| 128 997f43z9cv.rn.                                | 0 Advanced       |
| 129 28297-73-6.rn.                                | 0 Advanced       |
| 130 51-57-0.rn.                                   | 0 Advanced       |
| 131 537-46-2.rn.                                  | 0 Advanced       |
| 132 7632-10-2.rn.                                 | 0 Advanced       |
| 133 or/31-132                                     | 1799828 Advanced |
| 134 exp Communicable Diseases/                    | 497171 Advanced  |
| 135 Coronaviridae/                                | 1758 Advanced    |
| 136 exp Coronaviridae Infections/                 | 83144 Advanced   |
| 137 exp Coronavirus/                              | 67952 Advanced   |
| 138 exp Alphacoronavirus/                         | 2460 Advanced    |
| 139 exp Betacoronavirus/                          | 62248 Advanced   |
| 140 exp Gammacoronavirus/                         | 1731 Advanced    |
| 141 Severe Acute Respiratory Syndrome/            | 5516 Advanced    |
| 142 SARS Virus/                                   | 3847 Advanced    |
| 143 Middle East Respiratory Syndrome Coronavirus/ | 1579 Advanced    |
| 144 Ebolavirus/                                   | 3479 Advanced    |
| 145 Hemorrhagic Fever, Ebola/                     | 5811 Advanced    |

|                                         |                 |
|-----------------------------------------|-----------------|
| 146 Influenzavirus A/                   | 252 Advanced    |
| 147 Influenza A Virus/                  | 21253 Advanced  |
| 148 Influenza A Virus, H1N1 Subtype/    | 15876 Advanced  |
| 149 Disease Outbreaks/                  | 83355 Advanced  |
| 150 Endemic Diseases/                   | 8527 Advanced   |
| 151 Epidemics/                          | 11362 Advanced  |
| 152 Pandemics/                          | 54802 Advanced  |
| 153 Disaster Planning/                  | 14645 Advanced  |
| 154 (communicable adj3 disease?).mp,kw. | 69061 Advanced  |
| 155 (infectious adj3 disease?).mp,kw.   | 142554 Advanced |
| 156 transmissibl*.mp,kw.                | 13826 Advanced  |
| 157 contagious*.mp,kw.                  | 10682 Advanced  |
| 158 coron?vir*.mp,kw.                   | 88829 Advanced  |
| 159 corona-virus*.mp,kw.                | 1963 Advanced   |
| 160 corono-virus*.mp,kw.                | 1 Advanced      |
| 161 alphacoron?virus*.mp,kw.            | 242 Advanced    |
| 162 betacoron?virus*.mp,kw.             | 33714 Advanced  |
| 163 gammacoron?virus*.mp,kw.            | 103 Advanced    |
| 164 orthocoron?viri*.mp,kw.             | 15 Advanced     |
| 165 covid*.mp,kw.                       | 122360 Advanced |
| 166 HCov*.mp,kw.                        | 978 Advanced    |



|                                                   |                |
|---------------------------------------------------|----------------|
| 167 nCov*.mp,kw.                                  | 1891 Advanced  |
| 168 sarscov*.mp,kw.                               | 221 Advanced   |
| 169 merscov*.mp,kw.                               | 17 Advanced    |
| 170 (cov2 or cov-2).mp,kw.                        | 77463 Advanced |
| 171 (cov19 or cov-19).mp,kw.                      | 114 Advanced   |
| 172 ("cov2019" or "cov-2019").mp,kw.              | 20 Advanced    |
| 173 (novel adj1 "2019").mp,kw.                    | 1531 Advanced  |
| 174 (wuhan adj1 virus).mp,kw.                     | 23 Advanced    |
| 175 HKU1.mp,kw.                                   | 409 Advanced   |
| 176 NL63.mp,kw.                                   | 600 Advanced   |
| 177 OC43.mp,kw.                                   | 831 Advanced   |
| 178 229E.mp,kw.                                   | 911 Advanced   |
| 179 (severe* adj3 acute? adj3 respirator*).mp,kw. | 24948 Advanced |
| 180 sars.mp,kw.                                   | 87269 Advanced |
| 181 ards.mp,kw.                                   | 14744 Advanced |
| 182 (middle east adj3 respirator*).mp,kw.         | 3421 Advanced  |
| 183 mers.mp,kw.                                   | 6404 Advanced  |
| 184 ebola*.mp,kw.                                 | 10171 Advanced |
| 185 influenzavirus*.mp,kw.                        | 1275 Advanced  |
| 186 "influenza a".mp,kw.                          | 53890 Advanced |
| 187 (swine* adj3 influenza).mp,kw.                | 2633 Advanced  |

|                                                         |         |          |
|---------------------------------------------------------|---------|----------|
| 188 h1n1.mp,kw.                                         | 21959   | Advanced |
| 189 outbreak*.mp,kw.                                    | 147740  | Advanced |
| 190 out-break*.mp,kw.                                   | 131     | Advanced |
| 191 widespread*.mp,kw.                                  | 175534  | Advanced |
| 192 (wide* adj2 spread*).mp,kw.                         | 8544    | Advanced |
| 193 endemic*.mp,kw.                                     | 97062   | Advanced |
| 194 holoendemic*.mp,kw.                                 | 476     | Advanced |
| 195 hyperendemic*.mp,kw.                                | 2119    | Advanced |
| 196 epidemic*.mp,kw.                                    | 120525  | Advanced |
| 197 hyperepidemic*.mp,kw.                               | 22      | Advanced |
| 198 hyperpandemic*.mp,kw.                               | 1       | Advanced |
| 199 (disaster* adj3 plan*).mp,kw.                       | 15607   | Advanced |
| 200 (health* adj3 catastroph*).mp,kw.                   | 1168    | Advanced |
| 201 (health* adj3 emergenc*).mp,kw.                     | 10950   | Advanced |
| 202 severe acute respiratory syndrome coronavirus 2.os. | 19      | Advanced |
| 203 COVID-19.rx,px,ox.                                  | 3691    | Advanced |
| 204 or/134-203                                          | 1283075 | Advanced |
| 205 30 and 133 and 204                                  | 2910    | Advanced |
| 206 exp animals/ not (exp animals/ and exp humans/)     | 4814124 | Advanced |
| 207 205 not 206                                         | 2881    | Advanced |
| 208 limit 207 to "all child (0 to 18 years)"            | 381     | Advanced |

|                                                                                                        |                  |
|--------------------------------------------------------------------------------------------------------|------------------|
| 209 limit 207 to "all adult (19 plus years)"                                                           | 1520 Advanced    |
| 210 208 not 209                                                                                        | 87 Advanced      |
| 211 207 not 210                                                                                        | 2794 Advanced    |
| 212 limit 211 to (english or french)                                                                   | 2628 Advanced    |
| 213 20200801:20211231.(da).                                                                            | 1569337 Advanced |
| 214 20200801:20211231.(dt).                                                                            | 1141366 Advanced |
| 215 20200801:20211231.(ed).                                                                            | 746323 Advanced  |
| 216 20200801:20211231.(ep).                                                                            | 865992 Advanced  |
| 217 20200801:20211231.(ez).                                                                            | 1111482 Advanced |
| 218 20200801:20211231.(rd).                                                                            | 4310899 Advanced |
| 219 (2020 aug* or 2020 sep* or 2020 oct* or 2020 nov* or 2020 dec*).dp.                                | 384654 Advanced  |
| 220 ("2020 08*" or "2020 8*" or "2020 09*" or "2020 9*" or "2020 10*" or "2020 11*" or "2020 12*").dp. | 222935 Advanced  |
| 221 "2021*".dp.                                                                                        | 605520 Advanced  |
| 222 or/213-221                                                                                         | 4325917 Advanced |
| 223 212 and 222                                                                                        | 530 Advanced     |
