# Supplementary material
Source: HighWire-hosted journal article supplement (https://bmjopen.bmj.com/content/12/8/e063040)
Supplement: inline-supplementary-material-2 [file inline-supplementary-material-2.pdf]

**APPENDIX B: Grey Literature Sources**

Google, Canadian Public Health Association, Centers for Disease Control and Prevention (CDC), American Public Health Association, European Public Health Association, Africa CDC, World Federation of Public Health Associations, Canadian Centre on Substance Use and Addiction (CCSA), Centre of Addiction and Mental Health (CAMH), Canadian Research Institute in Substance Misuse (CRISM), United Nations Office on Drugs and Crime, Canadian Society of Addiction Medicine (CSAM-SMCA), National Institute on Drug Abuse, Society for the Study of Addiction (SSA), Gov.UK, European Monitoring Centre for Drugs and Drug Addiction, TRIP Database
