# Supplementary material
Source: HighWire-hosted journal article supplement (https://bmjopen.bmj.com/content/12/8/e063040)
Supplement: inline-supplementary-material-4 [file inline-supplementary-material-4.pdf]

**APPENDIX D: Characteristics of included records**

| Author/Organization                                       | Publication Year | Record type | Country | Setting                                                             | Communicable disease                                                                                                    | Life-limiting illness(es)                                                                                                 | Substance Use                                                                                                                   | Palliative care Intervention                                       |
|-----------------------------------------------------------|------------------|-------------|---------|---------------------------------------------------------------------|-------------------------------------------------------------------------------------------------------------------------|---------------------------------------------------------------------------------------------------------------------------|---------------------------------------------------------------------------------------------------------------------------------|--------------------------------------------------------------------|
| Batki, S/Center for Substance Abuse Treatment             | 2008             | Guidelines  | USA     | Not reported                                                        | HIV                                                                                                                     | AIDS                                                                                                                      | Injection drugs (heroin, cocaine)                                                                                               | ACP/GOC, symptom management, psychosocial support, staff education |
| Coughlan, M                                               | 2004             | Opinion     | General | Hospice, palliative care centres, palliative care clinic, home care | HIV                                                                                                                     | AIDS                                                                                                                      | Alcohol, injecting drug use, illicit drug use, opioids,                                                                         | Symptom management, staff education                                |
| Dong, K/ Canadian Research Initiative in Substance Misuse | 2021             | Guidelines  | Canada  | Acute care hospital                                                 | COVID-19, HIV, HCV                                                                                                      | COVID-19, blood borne and pathogenic infections (e.g., HIV), chronic respiratory illness, alcohol use disorder withdrawal | Alcohol, tobacco, cannabis, injection drugs, illegal drugs, stimulants, crack cocaine, benzodiazepine                           | ACP/GOC, symptom management, psychosocial support                  |
| Enggist, S/World Health Organization                      | 2014             | Guidelines  | General | Prisons                                                             | HIV, HBV, HCV, TB, methicillin-resistant Staphylococcus aureus, influenza, measles, mumps, rubella, tetanus, diphtheria | AIDS, COPD, cancer                                                                                                        | Alcohol, tobacco, illicit drugs (cannabis, cocaine, amphetamine, heroin), prescribed pharmaceuticals (opioids, benzodiazepines) | Psychosocial support                                               |
| Fantoni, M                                                | 1996             | Research    | Italy   | Acute care hospital, infectious disease clinic or day center        | HIV                                                                                                                     | AIDS                                                                                                                      | Intravenous drug use, intravenous heroin                                                                                        | Symptom management, psychosocial support, staff education          |
| Fraser, M                                                 | 1988             | Opinion     | USA     | Home-based hospice, residential hospice facility                    | HIV                                                                                                                     | AIDS                                                                                                                      | Drugs, alcohol, various substances                                                                                              | Symptom management                                                 |
| Hall, J                                                   | 2018             | Research    | USA     | Appalachian, USA counties                                           | HIV                                                                                                                     | HIV/AIDS                                                                                                                  | Intravenous drug use, "illicit drug use"                                                                                        | ACP/GOC, symptom management                                        |
| Halman, M                                                 | 2014             | Research    | Canada  | Community-based hospital                                            | HIV                                                                                                                     | HIV/AIDS                                                                                                                  | Alcohol, Cocaine, Marijuana, Crystal Meth, Others                                                                               | Psychosocial support                                               |
| Hansen, E                                                 | 2017             | Research    | USA     | HIV clinic and community venues                                     | HIV                                                                                                                     | HIV/AIDS                                                                                                                  | Cocaine, heroin, stimulants                                                                                                     | ACP/GOC                                                            |

| Author/Organization                              | Publication Year | Record type | Country | Setting                                                                                                                                                                                                    | Communicable disease | Life-limiting illness(es) | Substance Use                                                                                                        | Palliative care Intervention          |
|--------------------------------------------------|------------------|-------------|---------|------------------------------------------------------------------------------------------------------------------------------------------------------------------------------------------------------------|----------------------|---------------------------|----------------------------------------------------------------------------------------------------------------------|---------------------------------------|
| Health Care for the Homeless Clinicians' Network | 2018             | Guidelines  | USA     | Hospital, nursing home, group home, shelter, streets, hospice care provided in home, assisted living facilities, rehabilitation centers or hospitals, outpatient clinic, communities, palliative care unit | HIV                  | AIDS                      | Alcohol, methamphetamine, opioid, "illicit substance use", injection drug use                                        | Psychosocial support                  |
| Johnson, A                                       | 2012             | Research    | USA     | Pain management clinic                                                                                                                                                                                     | HIV                  | HIV/AIDS                  | Benzodiazepine, methadone, opioid, oxycodone, cocaine, cannabinoid, phencyclidine, amphetamine, intravenous drug use | Symptom management                    |
| Kaufman, N                                       | 1993             | Research    | USA     | Psychoanalyst office                                                                                                                                                                                       | HIV                  | HIV/AIDS                  | Cocaine, alcohol                                                                                                     | Psychosocial support, staff education |
| Kelleher, P                                      | 1997             | Research    | UK      | Hospice                                                                                                                                                                                                    | HIV                  | HIV/AIDS                  | Intravenous drug use, opioids, alcohol                                                                               | Symptom management, staff education   |
| Kimball, L                                       | 1996             | Research    | USA     | 3 home hospice programs to people with AIDS - 1 organization provides care in a 12 bed adult family home                                                                                                   | HIV                  | HIV/AIDS                  | Intravenous drug use                                                                                                 | Symptom management                    |

| Author/Organization | Publication Year | Record type | Country | Setting                                                                                                                                                      | Communicable disease | Life-limiting illness(es)                                                                                           | Substance Use                                          | Palliative care Intervention                      |
|---------------------|------------------|-------------|---------|--------------------------------------------------------------------------------------------------------------------------------------------------------------|----------------------|---------------------------------------------------------------------------------------------------------------------|--------------------------------------------------------|---------------------------------------------------|
| Krakauer, E         | 2007             | Other       | Vietnam | Cancer institute with inpatient beds and outpatient clinic, inpatient palliative care wards, hospice, community and home-based support services, pain clinic | HIV                  | HIV/AIDS, cancer                                                                                                    | Intravenous heroin                                     | Symptom management                                |
| Marie Curie         | 2019             | Guidelines  | UK      | General, home                                                                                                                                                | HIV, hepatitis       | Terminal illness                                                                                                    | Alcohol, opioids, cannabis, ecstasy, cocaine, diazepam | Symptom management                                |
| Merlin, J           | 2013             | Review      | USA     | Hospital, HIV/AIDS clinic, outpatient palliative care clinic, hospice, community                                                                             | HIV                  | AIDS, liver failure, non-AIDS defining malignancies                                                                 | Cocaine, heroin, alcohol                               | ACP/GOC, symptom management, psychosocial support |
| Mitchell, M         | 2018             | Research    | USA     | Patients recruited from outpatient HIV clinic in an academic hospital in Baltimore, Maryland                                                                 | HIV                  | AIDS                                                                                                                | Heroin, cocaine, stimulants                            | ACP/GOC                                           |
| Perry, B            | 2013             | Research    | USA     | Out-patient palliative care clinic (HIV palliative care clinic at the University of Alabama at Birmingham)                                                   | HIV                  | HIV infection, chronic obstructive pulmonary disease, sleep disorders, cardiovascular, depression, anxiety, bipolar | Intravenous drug use                                   | Symptom management                                |

| Author/Organization                                                  | Publication Year | Record type  | Country  | Setting                                                                           | Communicable disease     | Life-limiting illness(es)                                                                                                                                                                             | Substance Use                                              | Palliative care Intervention             |
|----------------------------------------------------------------------|------------------|--------------|----------|-----------------------------------------------------------------------------------|--------------------------|-------------------------------------------------------------------------------------------------------------------------------------------------------------------------------------------------------|------------------------------------------------------------|------------------------------------------|
| Selwyn, P                                                            | 2003             | Other        | USA      | Acute care hospital                                                               | HIV                      | AIDS, end-stage liver disease, non-AIDS defining cancer, pneumonia or sepsis, end-stage renal disease, amyotrophic lateral sclerosis, congestive heart failure, chronic obstructive pulmonary disease | Injection drug use, opioid                                 | Symptom management                       |
| Shernoff, M                                                          | 1998             | Book chapter | General  | General                                                                           | HIV                      | AIDS                                                                                                                                                                                                  | Alcohol, cannabis, amphetamines, inhaled nitrates, cocaine | Symptom management, psychosocial support |
| Skinner, E/International Association for Hospice and Palliative Care | 2020             | Guidelines   | General  | Hospitals, primary care, community-based services, long-term care, home, clinic   | COVID-19, HIV, TB, Ebola | Cancer, HIV/AIDS, neurodegenerative disorders (dementia), progressive neuromuscular diseases, metabolic disorders, terminal organ failures, cardiac or respiratory conditions, COVID-19               | "people who use drugs"                                     | Psychosocial support                     |
| Tagarro, M                                                           | 2013             | Book chapter | Portugal | Day care center for people living with HIV; residence for people living with AIDS | HIV, HCV and TB,         | AIDS                                                                                                                                                                                                  | Drugs                                                      | Psychosocial support                     |
| Task Force in Palliative Care (PalliCovidKerala)                     | 2020             | Guidelines   | India    | General                                                                           | COVID-19                 | COVID-19                                                                                                                                                                                              | Alcohol, tobacco, other substances                         | Symptom management, psychosocial support |
| Volling, C/Government of Canada                                      | 2020             | Guidelines   | Canada   | Long term care homes                                                              | COVID-19                 | Life-limiting illness                                                                                                                                                                                 | Alcohol                                                    | Symptom management                       |
| Wenger, N                                                            | 2001             | Research     | USA      | General                                                                           | HIV                      | AIDS                                                                                                                                                                                                  | Alcohol, intravenous drug use                              | ACP/GOC                                  |
| Wood, C                                                              | 1997             | Guidelines   | UK       | Hospice, outpatient clinic, home, community                                       | HIV                      | AIDS, cancer                                                                                                                                                                                          | Injected drugs                                             | Symptom management, psychosocial support |

| Author/Organization       | Publication Year | Record type  | Country | Setting                                                 | Communicable disease                                                                                                   | Life-limiting illness(es)                                                                                                    | Substance Use                        | Palliative care Intervention          |
|---------------------------|------------------|--------------|---------|---------------------------------------------------------|------------------------------------------------------------------------------------------------------------------------|------------------------------------------------------------------------------------------------------------------------------|--------------------------------------|---------------------------------------|
| World Health Organization | 2018             | Guidelines   | General | Humanitarian emergencies and crises                     | Ebola, SARS, influenza, yellow fever, measles, meningitis, cholera, hepatitis E, multidrug-resistant tuberculosis, HIV | Acute or advanced chronic illness, advanced disease with no available disease-modifying treatment, life-threatening injuries | Alcohol, drugs, opioids              | Symptom management                    |
| World Health Organization | 2021             | Guidelines   | General | Hospital, home, long-term care, community, home, clinic | COVID-19, HIV, TB, malaria, dengue, influenza                                                                          | COVID-19, HIV, TB, cardiac disease, chronic lung disease, cancer, organ failure                                              | Alcohol, caffeine, nicotine, smoking | Symptom management                    |
| Wrubel, J                 | 2009             | Research     | USA     | General                                                 | HIV                                                                                                                    | Cancer, AIDS                                                                                                                 | Drugs, alcohol                       | Psychosocial support                  |
| Yao, K                    | 2021             | Research     | Japan   | Acute care hospital                                     | COVID-19                                                                                                               | COVID-19                                                                                                                     | Alcohol, smoking                     | ACP/GOC                               |
| Zilber, C                 | 2006             | Book chapter | USA     | Hospital, home, clinic                                  | HIV                                                                                                                    | HIV/AIDS                                                                                                                     | Intravenous drugs, others            | Psychosocial support, staff education |

Acquired immunodeficiency syndrome (AIDS), advance care planning (ACP), coronavirus disease 2019 (COVID-19), goals of care (GOC), hepatitis C virus (HCV), human immunodeficiency virus (HIV), severe acute respiratory syndrome (SARS), tuberculosis (TB), United Kingdom (UK), United States of America (USA)
